# Supplementary material for: Association between soy products and prostate cancer: A systematic review and meta-analysis of observational studies
Source: PubMed Central journal article supplement — Investig Clin Urol. 2024 Oct 8;65(6):540–50. doi: 10.4111/icu.20240186 (PMC11543648; doi:10.4111/icu.20240186), 2024-10-08
Supplement: icu-65-540-s001.pdf [file icu-65-540-s001.pdf]

**Supplementary Table 1.** The search strategy in PubMed, EBSCO, Web of Science, and Cochrane Library database

| Database         | Search strategy                                                                                                                                                                                                                                                                                                                                                                                                                                                                                                    |
|------------------|--------------------------------------------------------------------------------------------------------------------------------------------------------------------------------------------------------------------------------------------------------------------------------------------------------------------------------------------------------------------------------------------------------------------------------------------------------------------------------------------------------------------|
| PubMed           | ("prostate cancer" OR "prostate neoplasm" OR "PCA" OR "prostatic carcinoma") AND ("soy" OR "soy products" OR "bean product" OR "soymilk" OR "soybean milk" OR "bean" OR "soy milk" OR "isoflavone" OR "bean curd" OR "beancurd" OR "tofu" OR "soy protein")                                                                                                                                                                                                                                                        |
| EBSCO            | (TX soy OR TX soy products OR TX bean product OR TX soymilk OR TX soybean milk OR TX beans OR TX soy milk OR TX isoflavones OR TX bean curd OR TX beancurd OR TX tofu OR TX soy protein) AND (S1 AND S2)                                                                                                                                                                                                                                                                                                           |
| Web of Science   | #1: (((TS=(prostate cancer)) OR TS=(prostate neoplasm)) OR TS=(PCA)) OR TS=(prostatic carcinoma) and Preprint Citation Index (Exclude – Database)<br>#2: ((((((((((TS=(soy)) OR TS=(soy products)) OR TS=(bean product)) OR TS=(soymilk)) OR TS=(soybean milk)) OR TS=(bean)) OR TS=(soy milk)) OR TS=(isoflavone)) OR TS=(bean curd)) OR TS=(beancurd)) OR TS=(tofu)) OR TS=(soy protein) and Preprint Citation Index (Exclude – Database)<br>Finally: #2 AND #1 and Preprint Citation Index (Exclude – Database) |
| Cochrane Library | #1: MeSH descriptor: [Prostatic Neoplasms] explode all trees<br>#2: MeSH descriptor: [Soybean Proteins] explode all trees<br>#3: MeSH descriptor: [Isoflavones] explode all trees<br>#4: MeSH descriptor: [Soy Foods] explode all trees<br>#5: MeSH descriptor: [Soy Milk] explode all trees<br>#6: #2 OR #3 OR #4 OR #5<br>#7/Finally: #1 AND #6                                                                                                                                                                  |
