# Supplementary material for: Association between soy products and prostate cancer: A systematic review and meta-analysis of observational studies
Source: PubMed Central journal article supplement — Investig Clin Urol. 2024 Oct 8;65(6):540–50. doi: 10.4111/icu.20240186 (PMC11543648; doi:10.4111/icu.20240186), 2024-10-08
Supplement: icu-65-540-s002.pdf [file icu-65-540-s002.pdf]

**Supplementary Table 2.** Characteristics of included observational studies in the meta-analysis

| Study                         | Study type         | Soy product type                    | Exposure assessment | Reference value (control group)                                                                                     | Adjusting parameters                                                                                                                                                                                                                                                                                             |
|-------------------------------|--------------------|-------------------------------------|---------------------|---------------------------------------------------------------------------------------------------------------------|------------------------------------------------------------------------------------------------------------------------------------------------------------------------------------------------------------------------------------------------------------------------------------------------------------------|
| Severson et al. [43] (1989)   | Cohort study       | Shoyu, tofu                         | FFQ                 | Shoyu: never-seldom<br>Tofu: ≤1 time/wk                                                                             | Subject's marital history, smoking history, occupational history, type of residence, educational history, alcohol consumption, and medical history                                                                                                                                                               |
| Jacobsen et al. [32] (1998)   | Cohort study       | Soy milk                            | FFQ                 | Soy milk: 0 g/day                                                                                                   | Body mass index, frequency consumption of coffee, whole fat milk, eggs, and citrus fruits, and age                                                                                                                                                                                                               |
| Greenlee et al. [20] (2004)   | Cohort study       | Soy foods                           | FFQ                 | Soy foods: 0 g/day                                                                                                  | Sex, race, and education                                                                                                                                                                                                                                                                                         |
| Allen et al. [29] (2004)      | Cohort study       | Soya, miso soup, tofu               | FFQ                 | Soya: low<br>Miso soup: <2 time/wk<br>Tofu: <2 time/wk                                                              | Attained age, calendar period, city of residence at the time of the bombings, radiation dose and education level                                                                                                                                                                                                 |
| Nomura et al. [39] (2004)     | Cohort study       | Tofu                                | FFQ                 | Tofu: 0 g/day                                                                                                       | Age, cigarette smoking, alcohol intake, total calories, arm muscle area, and body mass index                                                                                                                                                                                                                     |
| Kurahashi et al. [22] (2007)  | Cohort study       | Soy food, miso soup                 | FFQ                 | Soy foods: <46.6 g/day<br>Miso soup: <110.0 mL/day                                                                  | Age, area, smoking status, drinking frequency, marital status, body mass index, and intake of total fatty acids, dairy, vegetables, and fruits                                                                                                                                                                   |
| Kirsh et al. [21] (2007)      | Cohort study       | Dry bean, tofu, soybean             | FFQ                 | Dry beans: <0.06 serving/day<br>Tofu or soybeans: 0 g/day                                                           | Age, total energy, race, study center, family history of prostate cancer, body mass index, smoking status, physical activity, supplemental vitamin E intake, total fat intake, red meat intake, diabetes, aspirin use, and previous number of prostate cancer screening examinations during the follow-up period |
| Park et al. [23] (2008)       | Cohort study       | Legumes, soy foods                  | FFQ                 | All legumes: <6.4 g/1,000 kcal<br>Soy products: 0 g/1,000 kcal<br>Legumes excluding soy products: <3.6 g/1,000 kcal | Time since cohort entry, ethnicity, family history of prostate cancer, education, body mass index, smoking status and energy intake                                                                                                                                                                              |
| Petimar et al. [41] (2017)    | Cohort study       | Mature bean                         | FFQ                 | Mature bean: <15 g/day                                                                                              | Marital status, race, education, body mass index, height, multivitamin use, total energy intake, smoking status, prostate cancer family history, physical activity, history of diabetes, age                                                                                                                     |
| Sawada et al. [42] (2020)     | Cohort study       | Soy foods, miso soup, natto, tofu   | FFQ                 | Soy food: <29.8 g/day<br>Miso: <2.9 g/day<br>Natto: 0 g/day<br>Tofu: <7.4 g/day                                     | Age, area, smoking, alcohol frequency, body mass index, leisure time activity, history of diabetes mellitus, screening and intake of green tea, coffee, vegetables and fruit                                                                                                                                     |
| Oishi et al. [40] (1988)      | Case-control study | Miso soup                           | Interview           | Miso soup: 0 g/day                                                                                                  | NA                                                                                                                                                                                                                                                                                                               |
| Sung et al. [45] (1999)       | Case-control study | Soybean milk                        | FFQ, interview      | Soybean milk: 0 g/day                                                                                               | Age                                                                                                                                                                                                                                                                                                              |
| Villeneuve et al. [46] (1999) | Case-control study | Tofu, soybean, lentils, baked beans | FFQ                 | Tofu or soybean: 0 g/day<br>Lentils and baked beans: 0 g/day                                                        | Age, province of residence, race, years since quitting smoking, cigarette pack-years, body mass index, rice and pasta, coffee, grains and cereals, alcohol, fruit and fruit juices, tofu, meat, income, and family history of cancer                                                                             |
| Kolonel et al. [34] (2000)    | Case-control study | Soyfoods, legumes                   | FFQ, interview      | Soyfoods: 0 g/day<br>Legumes (excluding soyfoods): <2.6 g/day<br>All legumes: <10 g/day                             | Age, education, ethnicity, geographic area, and calories                                                                                                                                                                                                                                                         |
| Lee et al. [35] (2003)        | Case-control study | Combined soy foods, tofu            | Interview           | Combined soy foods: <27.5 g/day<br>Tofu: <14.3 g/day                                                                | Total calories and age                                                                                                                                                                                                                                                                                           |
| Sonoda et al. [44] (2004)     | Case-control study | Soy foods, natto, tofu              | FFQ, interview      | Soy products: <77 g/day<br>Natto: <5.7 g/day<br>Tofu: <19.7 g/day                                                   | Cigarette smoking and energy intake                                                                                                                                                                                                                                                                              |
| Jian et al. [33] (2004)       | Case-control study | Fermented soy products              | FFQ, interview      | Fermented soy products: <0.1 g/day                                                                                  | Age at interview, body mass index, physical activity, locality of residence, education, family income per month, marital status, prostate cancer in first-degree relatives, caloric intake, fresh vegetables and fruits consumption, tea drinking                                                                |
| McCann et al. [37] (2005)     | Case-control study | Soy foods                           | FFQ                 | Soy products: <2 g/day                                                                                              | Age, education, body mass index, cigarette smoking status, and total energy                                                                                                                                                                                                                                      |
| Hedelin et al. [31] (2006)    | Case-control study | Beans, soy                          | FFQ                 | Soy products: <1.18 g/day                                                                                           | Age, intake of antibiotics, zinc, animal fat, total energy intake, alcohol, vegetable fat, red meat, vegetables, fruit, and tocopherol during the last year                                                                                                                                                      |
| Heald et al. [30] (2007)      | Case-control study | Soy foods                           | FFQ                 | Soy products: 0 g/day                                                                                               | Age, total energy intake, family history of prostate cancer and breast cancer, Carstairs deprivation index, smoking and energy intake                                                                                                                                                                            |
| Nagata et al. [38] (2007)     | Case-control study | Soy foods                           | FFQ                 | Soy products: 30.5 g/day                                                                                            | Cigarette smoking, energy and fatty acids intakes                                                                                                                                                                                                                                                                |
| Li et al. [36] (2008)         | Case-control study | Tofu, soy milk                      | FFQ, interview      | Soybean food (tofu and soy milk): ≤2 time/week                                                                      | Education, body mass index, smoking, alcohol consumption, and food frequency                                                                                                                                                                                                                                     |

FFQ, food frequency questionnaire; NA, not available.
