# Supplementary material for: Association between soy products and prostate cancer: A systematic review and meta-analysis of observational studies
Source: PubMed Central journal article supplement — Investig Clin Urol. 2024 Oct 8;65(6):540–50. doi: 10.4111/icu.20240186 (PMC11543648; doi:10.4111/icu.20240186), 2024-10-08
Supplement: icu-65-540-s003.pdf [file icu-65-540-s003.pdf]

Supplementary Table 3. Quality assessment of cohort studies included

| Study (observational)        | Selection (out of 4)                 |                                 |                           |                                               | Outcomes (out of 3)      |                        |                     |                                  | Total (out of 9) |
|------------------------------|--------------------------------------|---------------------------------|---------------------------|-----------------------------------------------|--------------------------|------------------------|---------------------|----------------------------------|------------------|
|                              | Representativeness of exposed cohort | Selection of non-exposed cohort | Ascertainment of exposure | Outcome not present at the start of the study | Comparability (out of 2) | Assessment of outcomes | Length of follow-up | Adequacy of follow-up of cohorts |                  |
| Severson et al. [43] (1989)  | 1                                    | 1                               | 1                         | 1                                             | 2                        | 0                      | 1                   | 1                                | 8                |
| Jacobsen et al. [32] (1998)  | 1                                    | 0                               | 1                         | 1                                             | 1                        | 1                      | 1                   | 1                                | 7                |
| Greenlee et al. [20] (2004)  | 0                                    | 1                               | 1                         | 1                                             | 2                        | 1                      | 1                   | 1                                | 8                |
| Allen et al. [29] (2004)     | 0                                    | 1                               | 0                         | 1                                             | 1                        | 1                      | 1                   | 1                                | 6                |
| Nomura et al. [39] (2004)    | 1                                    | 1                               | 1                         | 1                                             | 2                        | 1                      | 1                   | 0                                | 8                |
| Kurahashi et al. [22] (2007) | 1                                    | 1                               | 1                         | 0                                             | 2                        | 0                      | 1                   | 1                                | 7                |
| Kirsh et al. [21] (2007)     | 1                                    | 1                               | 1                         | 1                                             | 0                        | 1                      | 1                   | 1                                | 7                |
| Park et al. [23] (2008)      | 0                                    | 1                               | 1                         | 1                                             | 2                        | 1                      | 1                   | 1                                | 8                |
| Petimar et al. [41] (2017)   | 1                                    | 1                               | 0                         | 1                                             | 1                        | 1                      | 1                   | 1                                | 7                |
| Sawada et al. [42] (2020)    | 1                                    | 1                               | 1                         | 1                                             | 2                        | 1                      | 1                   | 1                                | 9                |

The observational studies were assessed by the Newcastle–Ottawa Quality Assessment Scale (NOS) checklist of cohort studies.
