# Supplementary material for: Association between soy products and prostate cancer: A systematic review and meta-analysis of observational studies
Source: PubMed Central journal article supplement — Investig Clin Urol. 2024 Oct 8;65(6):540–50. doi: 10.4111/icu.20240186 (PMC11543648; doi:10.4111/icu.20240186), 2024-10-08
Supplement: icu-65-540-s004.pdf [file icu-65-540-s004.pdf]

**Supplementary Table 4.** Quality assessment of case control studies included

| Study (observational)         | Selection (out of 4)     |                                 |                       |                        | Comparability (out of 2) | Outcomes (out of 3)       |                                                     |                   | Total (out of 9) |
|-------------------------------|--------------------------|---------------------------------|-----------------------|------------------------|--------------------------|---------------------------|-----------------------------------------------------|-------------------|------------------|
|                               | Adequate case definition | Representativeness of the cases | Selection of controls | Definition of controls |                          | Ascertainment of exposure | Same method of ascertainment for cases and controls | Non-response rate |                  |
| Oishi et al. [40] (1988)      | 0                        | 1                               | 1                     | 1                      | 2                        | 1                         | 1                                                   | 1                 | 8                |
| Sung et al. [45] (1999)       | 1                        | 1                               | 1                     | 1                      | 1                        | 1                         | 1                                                   | 1                 | 7                |
| Villeneuve et al. [46] (1999) | 1                        | 0                               | 1                     | 0                      | 2                        | 0                         | 1                                                   | 1                 | 6                |
| Kolonel et al. [34] (2000)    | 1                        | 1                               | 1                     | 0                      | 1                        | 1                         | 1                                                   | 1                 | 7                |
| Lee et al. [35] (2003)        | 1                        | 1                               | 0                     | 1                      | 2                        | 1                         | 1                                                   | 1                 | 8                |
| Sonoda et al. [44] (2004)     | 0                        | 1                               | 1                     | 1                      | 2                        | 1                         | 1                                                   | 1                 | 8                |
| Jian et al. [33] (2004)       | 1                        | 1                               | 1                     | 1                      | 1                        | 1                         | 1                                                   | 1                 | 8                |
| McCann et al. [37] (2005)     | 1                        | 1                               | 1                     | 0                      | 2                        | 0                         | 1                                                   | 1                 | 7                |
| Hedelin et al. [31] (2006)    | 1                        | 1                               | 1                     | 1                      | 1                        | 1                         | 1                                                   | 0                 | 7                |
| Heald et al. [30] (2007)      | 1                        | 1                               | 1                     | 1                      | 2                        | 1                         | 1                                                   | 1                 | 9                |
| Nagata et al. [38] (2007)     | 0                        | 1                               | 1                     | 1                      | 2                        | 1                         | 1                                                   | 1                 | 8                |
| Li et al. [36] (2008)         | 1                        | 1                               | 1                     | 1                      | 1                        | 1                         | 1                                                   | 1                 | 8                |

The observational studies were assessed by the Newcastle–Ottawa Quality Assessment Scale (NOS) checklist of case control studies.
